# Supplementary material for: Factors Affecting the Cervical Cancer Screening Behaviors of Japanese Women in Their 20s and 30s Using a Health Belief Model: A Cross-Sectional Study
Source: MDPI journal article supplement (doi:10.3390/curroncol29090494), 2022-08-31
Supplement: s1 [file s1]

# Factors Affecting the Cervical Cancer Screening Behaviors of Japanese Women in Their 20s and 30s Using a Health Belief Model: A Cross-Sectional Study

Zhengai Cui, Hiromi Kawasaki, Miwako Tsunematsu, Yingai Cui and Masayuki Kakehashi

**Table S1.** All personal characteristics used in this study.

| Characteristic                      | Total<br>( <i>n</i> =816) |
|-------------------------------------|---------------------------|
| Region                              |                           |
| Hokkaido                            | 32 (3.9%)                 |
| Tohoku                              | 60 (7.4%)                 |
| Kanto • Koshinetsu                  | 303 (37.1%)               |
| Tokai • Hokuriku                    | 123 (15.1%)               |
| Kinki                               | 130 (15.9%)               |
| Chugoku • Shikoku                   | 70 (8.6%)                 |
| Kyushu • Okinawa                    | 98 (12.0%)                |
| Population size                     |                           |
| 23 wards of Tokyo or 1,000,000-city | 192 (23.5%)               |
| 800,00-city                         | 77 (9.4%)                 |
| 300,000-city                        | 179 (21.9%)               |
| 100,000-city                        | 184 (22.5%)               |
| 50,00-city                          | 94 (11.5%)                |
| Towns and villages                  | 90 (11.0%)                |
| Age                                 |                           |
| 20-24                               | 97 (11.9%)                |
| 25-29                               | 293 (35.9%)               |
| 30-34                               | 211 (25.9%)               |
| 35-39                               | 215 (26.3%)               |
| BMI *                               |                           |
| Lean                                | 173 (21.2%)               |
| Normal                              | 563 (69.0%)               |
| Obese                               | 80 (9.8%)                 |
| Marital Status                      |                           |
| Married                             | 460 (56.4%)               |
| Single                              | 356 (43.6%)               |
| Children                            |                           |
| Yes                                 | 346 (42.4%)               |
| No                                  | 470 (57.6%)               |
| Household composition               |                           |
| Single                              | 145 (17.8%)               |
| 2-person household                  | 163 (20.0%)               |
| 2-generation family                 | 422 (51.7%)               |
| 3-generation family                 | 59 (7.2%)                 |
| Others                              | 27 (3.3%)                 |
| Employment status                   |                           |
| Self-employed                       | 26 (3.2%)                 |
| Regular employment                  | 340 (41.7%)               |

|                                        |             |
|----------------------------------------|-------------|
| Parttime job                           | 152 (18.6%) |
| Students                               | 46 (5.6%)   |
| Housewife                              | 205 (25.1%) |
| Unemployed                             | 47 (5.8%)   |
| Educational Background                 |             |
| Primary and secondary school           | 22 (2.7%)   |
| High School                            | 196 (24.0%) |
| Junior colleges and vocational schools | 174 (21.3%) |
| University                             | 299 (36.6%) |
| Graduate School                        | 24 (2.9%)   |
| Others                                 | 101 (12.4%) |
| Household income **                    |             |
| No income                              | 15 (1.8%)   |
| Less than \$7324                       | 23 (2.8%)   |
| \$7324-\$21898                         | 97 (11.9%)  |
| \$21971-\$36545                        | 266 (32.6%) |
| \$36618-\$51192                        | 211 (25.9%) |
| \$51265-\$73229                        | 124 (15.2%) |
| \$73236-\$109781                       | 61 (7.5%)   |
| More than \$109854                     | 19 (2.3%)   |
| Medical insurance ***                  |             |
| Association health insurance           | 319 (39.1%) |
| Union health insurance                 | 107 (13.1%) |
| Mutual aid association                 | 75 (9.2%)   |
| National health insurance              | 233 (28.6%) |
| National health insurance association  | 50 (6.1%)   |
| Unknown                                | 20 (2.5%)   |
| Others                                 | 12 (1.5%)   |
| Medical insurance (dependent)          |             |
| Myself                                 | 465 (57.0%) |
| Family                                 | 351 (43.0%) |
| Family history of breast cancer        |             |
| Yes                                    | 73 (8.9%)   |
| No                                     | 743 (91.1%) |
| Family history of cervical cancer      |             |
| Yes                                    | 36 (4.4%)   |
| No                                     | 780 (95.6%) |
| Family history of others cancer        |             |
| Yes                                    | 336 (41.2%) |
| No                                     | 480 (58.8%) |
| Medical consultation                   |             |
| Yes                                    | 198 (24.3%) |
| No                                     | 618 (75.7%) |
| Health Status                          |             |
| Bad                                    | 19 (2.3%)   |
| Slightly bad                           | 123 (15.1%) |
| Normal                                 | 433 (53.1%) |
| Slightly good                          | 149 (18.3%) |
| Good                                   | 92 (11.3%)  |
| Are you taking care of your own health |             |
| Not careful at all                     | 22 (2.7%)   |
| Not very careful                       | 134 (16.4%) |
| Cannot say either way                  | 186 (22.8%) |

|                                      |             |
|--------------------------------------|-------------|
| Sometimes very careful               | 365 (44.7%) |
| Always very careful                  | 109 (13.4%) |
| Do you have health concerns          |             |
| Very anxious                         | 77 (9.4%)   |
| A little anxious                     | 369 (45.2%) |
| Cannot say either way                | 241 (29.5%) |
| No anxiety                           | 102 (12.5%) |
| No anxiety at all                    | 27 (3.3%)   |
| What to pay attention to for health  |             |
| Pay attention to diet                |             |
| Yes                                  | 495 (60.7%) |
| No                                   | 321 (39.3%) |
| Get enough sleep                     |             |
| Yes                                  | 508 (62.3%) |
| No                                   | 308 (37.7%) |
| Drink too much alcohol               |             |
| Yes                                  | 288 (35.3%) |
| No                                   | 528 (64.7%) |
| Smoking cigarettes                   |             |
| Yes                                  | 451 (55.3%) |
| No                                   | 365 (44.7%) |
| Have regular health checkups         |             |
| Yes                                  | 136 (16.7%) |
| No                                   | 680 (83.3%) |
| Do regular exercise                  |             |
| Yes                                  | 183 (22.4%) |
| No                                   | 633 (77.6%) |
| Avoid stress                         |             |
| Yes                                  | 282 (34.6%) |
| No                                   | 534 (65.4%) |
| Rinse your mouth and wash your hands |             |
| Yes                                  | 384 (47.1%) |
| No                                   | 432 (52.9%) |
| Others                               |             |
| Yes                                  | 12 (1.5%)   |
| No                                   | 804 (98.5%) |
| The most feared disease              |             |
| Cancer                               | 336 (41.2%) |
| Heart disease                        | 51 (6.3%)   |
| Brain Attack                         | 105 (12.9%) |
| Pneumonia                            | 6 (0.7%)    |
| Diabetes                             | 54 (6.6%)   |
| Liver disease                        | 10 (1.2%)   |
| Dementia                             | 83 (10.2%)  |
| Depression                           | 53 (6.5%)   |
| None                                 | 104 (12.7%) |
| Others                               | 14 (1.7%)   |
| Influenza vaccination                |             |
| Vaccinated every year                | 218 (26.7%) |
| Sometimes vaccinated                 | 144 (17.6%) |
| Vaccinated by chance                 | 49 (6.0%)   |
| Not vaccinated                       | 306 (37.5%) |
| Thinking vaccination is useless      | 99 (12.1%)  |

|                           |             |
|---------------------------|-------------|
| Private medical insurance |             |
| Yes                       | 400 (49.0%) |
| No                        | 416 (51.0%) |

\*\*BMI: Lean (BMI<18.5), Normal(18.5≤BMI<25), and Obese (BMI≥25). \*\*Household income: Calculated according to the exchange rate on July 26, 2022 (1 yen = \$0.0073). \*\*\*Employee insurance mainly includes "Association health insurance (for employees of small and medium-sized companies and their dependents)," "Union health insurance (for employees of large companies and their dependents)," "Mutual aid association (for public employees and their dependents)," and "National health insurance association (for doctors, construction workers and their dependents). Regional insurance includes "National health insurance (for people who are not covered by employee insurance, such as the self-employed and unemployed).

**Table S2.** The cervical cancer screening participation status and reasons for non-participation.

| Characteristic                                             | Total<br>(n=816) |
|------------------------------------------------------------|------------------|
| Participation in cervical cancer screening                 |                  |
| Yes                                                        | 321 (39.3%)      |
| No                                                         | 495 (60.7%)      |
| Status of participation in cervical cancer screening       |                  |
| Population-based                                           | 127 (39.6%)      |
| Workplace-based                                            | 42 (13.1%)       |
| Individual complete physical examination/hospital visit    | 137 (42.7%)      |
| Others                                                     | 15 (4.7%)        |
| Reasons for not participating in cervical cancer screening |                  |
| Busy                                                       | 76 (15.4%)       |
| I'm healthy                                                | 38 (7.7%)        |
| I am anxious about the results                             | 27 (5.5%)        |
| Because I did not know about cancer screening              | 15 (3.0%)        |
| Because I never had a chance to have a cancer screening    | 184 (37.2%)      |
| Because I forgot to take the test                          | 57 (11.5%)       |
| I don't think I am old enough to have a checkup            | 58 (11.7%)       |
| Too much trouble                                           | 2 (0.4%)         |
| Others                                                     | 38 (7.7%)        |

**Table S3.** 27 variables of the health belief model in this study.

| Characteristic                                                             | Strongly disagree | Disagree    | Neither agree nor disagree | Agree       | Strongly agree |
|----------------------------------------------------------------------------|-------------------|-------------|----------------------------|-------------|----------------|
| I may develop female cancer in the future.                                 | 31 (3.8%)         | 79 (9.7%)   | 374 (45.8%)                | 265 (32.5%) | 67 (8.2%)      |
| I may develop female cancer within a few years.                            | 61 (7.5%)         | 181 (22.2%) | 496 (60.8%)                | 60 (7.4%)   | 18 (2.2%)      |
| I am more likely to develop female cancer than other women.                | 58 (7.1%)         | 176 (21.6%) | 436 (53.4%)                | 123 (15.1%) | 23 (2.8%)      |
| I am afraid of developing female cancer.                                   | 10 (1.2%)         | 15 (1.8%)   | 60 (7.4%)                  | 360 (44.1%) | 371 (45.5%)    |
| If I develop female cancer, my life will be changed.                       | 4 (0.5%)          | 22 (2.7%)   | 100 (12.3%)                | 364 (44.6%) | 326 (40.0%)    |
| If I develop female cancer, my activities of daily living will be limited. | 3 (0.4%)          | 31 (3.8%)   | 100 (12.3%)                | 377 (46.2%) | 305 (37.4%)    |
| If I develop female cancer, my family will be made trouble.                | 8 (1.0%)          | 29 (3.6%)   | 78 (9.6%)                  | 369 (45.2%) | 332 (40.7%)    |
| I'm scared that I'll find a woman's cancer by having a cancer screening.   | 31 (3.8%)         | 103 (12.6%) | 153 (18.8%)                | 306 (37.5%) | 223 (27.3%)    |

|                                                                                                                                  |             |             |             |             |             |
|----------------------------------------------------------------------------------------------------------------------------------|-------------|-------------|-------------|-------------|-------------|
| Participation in female cancer screening can lead to reduction in mortality from female cancer.                                  | 7 (0.9%)    | 30 (3.7%)   | 107 (13.1%) | 379 (46.5%) | 293 (35.9%) |
| Participation in female cancer screening can lead to early detection of female cancer.                                           | 3 (0.4%)    | 7 (0.9%)    | 53 (6.5%)   | 352 (43.1%) | 401 (49.1%) |
| Having a women's cancer screening can give you peace of mind about your health.                                                  | 7 (0.9%)    | 19 (2.3%)   | 107 (13.1%) | 410 (50.3%) | 273 (33.5%) |
| Participation in female cancer screening can lead to better management of my health.                                             | 9 (1.1%)    | 8 (1.0%)    | 85 (10.4%)  | 424 (52.0%) | 290 (35.5%) |
| I do not have time to participate in female cancer screening.                                                                    | 58 (7.1%)   | 185 (22.7%) | 235 (28.8%) | 254 (31.1%) | 84 (10.3%)  |
| Participation in female cancer screening is costly.                                                                              | 14 (1.7%)   | 88 (10.8%)  | 156 (19.1%) | 368 (45.1%) | 190 (23.3%) |
| I don't know where to go for a female cancer screening.                                                                          | 138 (16.9%) | 240 (29.4%) | 154 (18.9%) | 204 (25.0%) | 80 (9.8%)   |
| I forget to regularly participate in female cancer screening.                                                                    | 37 (4.5%)   | 142 (17.4%) | 225 (27.6%) | 319 (39.1%) | 93 (11.4%)  |
| I am embarrassed about participating in female cancer screening because it includes examination of a delicate area.              | 81 (9.9%)   | 174 (21.3%) | 171 (21.0%) | 251 (30.8%) | 139 (17.0%) |
| Female cancer screening causes discomfort, even pain.                                                                            | 19 (2.3%)   | 98 (12.0%)  | 239 (29.3%) | 313 (38.4%) | 147 (18.0%) |
| I do not want to participate in female cancer screening that is performed by male doctors/staff members.                         | 57 (7.0%)   | 154 (18.9%) | 225 (27.6%) | 224 (27.5%) | 156 (19.1%) |
| There are other things in my life that are more important than getting screened for women's cancer.                              | 63 (7.7%)   | 226 (27.7%) | 385 (47.2%) | 106 (13.0%) | 36 (4.4%)   |
| I do not need to participate in female cancer screening because I can visit a medical institution whenever there is any concern. | 121 (14.8%) | 371 (45.5%) | 269 (33.0%) | 42 (5.2%)   | 13 (1.6%)   |
| I do not need to participate in female cancer screening because I have no subjective symptoms.                                   | 136 (16.7%) | 368 (45.1%) | 212 (26.0%) | 86 (10.5%)  | 14 (1.7%)   |
| Participation in female cancer screening is less important than other health issues.                                             | 135 (16.5%) | 412 (50.5%) | 222 (27.2%) | 37 (4.5%)   | 10 (1.2%)   |
| A close friend or acquaintance recommends that you have a cancer screening for women.                                            | 121 (14.8%) | 211 (25.9%) | 303 (37.1%) | 155 (19.0%) | 26 (3.2%)   |
| My closest family members recommend that I participate in female cancer screening.                                               | 117 (14.3%) | 222 (27.2%) | 255 (31.3%) | 171 (21.0%) | 51 (6.3%)   |
| The doctors at the hospital which I regularly visit recommend that I participate in female cancer screening.                     | 192 (23.5%) | 277 (34.0%) | 238 (29.2%) | 95 (11.6%)  | 14 (1.7%)   |
| My close friends/acquaintances recommend that I participate in female cancer screening.                                          | 78 (9.6%)   | 152 (18.6%) | 327 (40.1%) | 214 (26.2%) | 45 (5.5%)   |
